# Supplementary material for: Cathode photoelectrochemical sensing of copper(ii) based on analyte-induced formation of exciton trapping
Source: Royal Society of Chemistry journal article supplement (doi:10.1039/c2cc35643k), 2012-01-01
Supplement: c2cc35643k.pdf [file c2cc35643k.pdf]

Electronic Supplementary Information (ESI) for Chemical Communications

This journal is (c) The Royal Society of Chemistry 2012

## **Cathode photoelectrochemical sensing of copper (II) based on analyte-induced formation of exciton trapping**

Peng Wang, Xiuyuan Ma, Mengqi Su, Qing Hao, Jianping Lei\* and Huangxian Ju\*

State Key Laboratory of Analytical Chemistry for Life Science, Department of Chemistry,

Nanjing University, Nanjing 210093, P.R. China

### **Experimental details**

**Reagents and materials.** Cupric nitrate ( $\text{Cu}(\text{NO}_3)_2 \cdot 3\text{H}_2\text{O}$ ) was purchased from Shanghai Sinpeuo Fine Chemical Co., Ltd. (China). Meso-2,3-dimercaptosuccinic acid (DMSA) and cadmium chloride ( $\text{CdCl}_2 \cdot 2.5\text{H}_2\text{O}$ ) were purchased from Alfa Aesar China Ltd (China). Tellurium rod (4 mm in diameter) was purchased from Leshan Kayada Photoelectricity Co. (China). All other chemicals were of analytical grade without further purification.  $\text{H}_3\text{BO}_3$ - $\text{Na}_2\text{B}_4\text{O}_7$  (0.1 M, pH 6) buffer was used throughout the photoelectrochemical (PEC) detection. All aqueous solutions were prepared using ultra-pure water obtained from a Millipore system ( $\geq 18 \text{ M}\Omega$ , Milli-Q, Millipore). F-doped tin oxide (FTO) membrane covered glass as the electrode material was purchased from Beijing Midwest Group Technology Co., Ltd (China). The glass was cut into 4.5 cm  $\times$  0.8 cm slices and successively bathed in 0.5 M NaOH solution for 10 min, 10%  $\text{H}_2\text{O}_2$  solution for 10 min, and acetone for 30 min, then

washed with water and dried prior to use. The human hair sample was digested with the mixture of 70% (W/W) nitric acid and 60% (W/W) perchloric acid (3:1 V/V). After digestion, the resulting sample solution was diluted and neutralized to pH 6 with 0.5 M NaOH solution prior to detection.

**Apparatus.** A CHI 660D electrochemical workstation (CHI, USA) was used to synthesize DMSA capped CdTe QDs. PEC detection was performed on a Zahner intensity modulated photo spectrometer (Zahner, German) with a LW405 LED light as the accessory light source. The inductively coupled plasma (ICP) spectroscopic detection of metal elements in the human hair sample was performed on a J-A1100 inductively coupled plasma spectrometer (Jarrell-Ash Co. USA). The X-ray photoelectron spectra (XPS) data was gained by a PHI5000 VersaProbe X-ray photoelectron spectrometer (ULVAC-PHI Co. Japan). The scanning electron microscopic (SEM) images were obtained by Hitachi S-4800 scanning electron microscope (Japan).

**Synthesis of DMSA capped CdTe QDs.** The DMSA capped CdTe QDs was synthesized by our reported electrolysis method.<sup>S1</sup> First, 6.5 mg DMSA, 200  $\mu$ L 1 M NaOH (a.q.), and 120  $\mu$ L 0.1M CdCl<sub>2</sub> (a.q.) were added into 20 mL water in sequence to make a mixture solution. This solution was then electrolyzed under a N<sub>2</sub> atmosphere by the cleaned Te electrode at -1.0 V vs. saturated calomel electrode (SCE) until the quantity of electricity was 0.5 coulombs. The resulting solution was refluxed at 50°C for 24 hours to get the product. The final solution of QDs was kept at 4 °C prior to use. After storage for 2 months, the solution remained clear and stable.

**PEC performance.** PEC detection was performed in a quartz photoelectrochemical cell. The functionalized FTO glass as the working electrode, a platinum wire electrode as the auxiliary electrode and a saturated calomel electrode as the reference electrode were inserted into this cell to form a three-electrode system. 10 mL buffer as the electrolyte was added into the cell. Under illumination, the electrical signal was gained and compared with that gained in dark. The wavelength of the LED light was 405 nm, and the intensity was kept  $50 \text{ W m}^{-2}$  during illumination.

### UV-vis and photoluminescent (PL) spectra of QDs

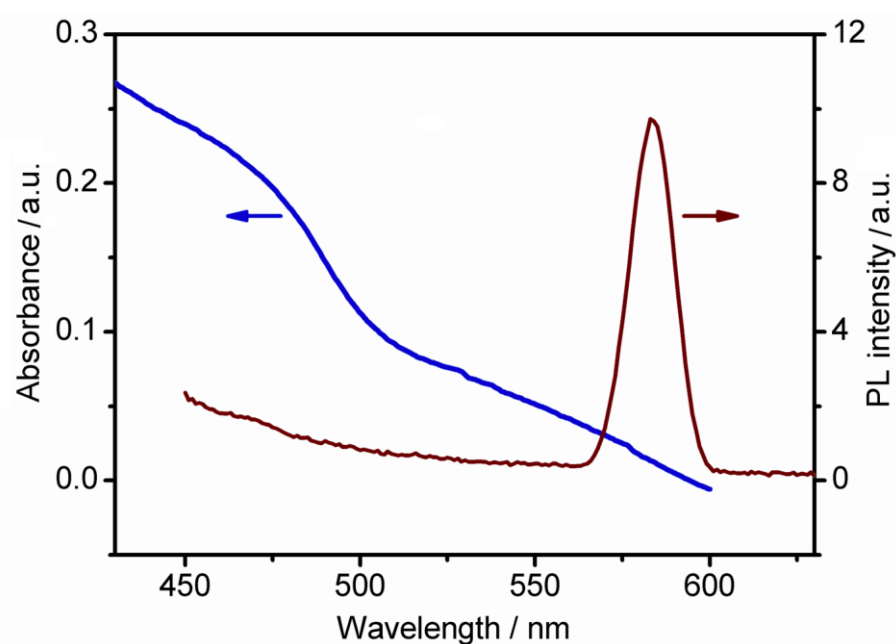

**Fig. S1** UV-vis (blue) and PL (red) spectra of the QDs. Excitation wavelength: 380 nm.

## Photograph and SEM image of the QDs

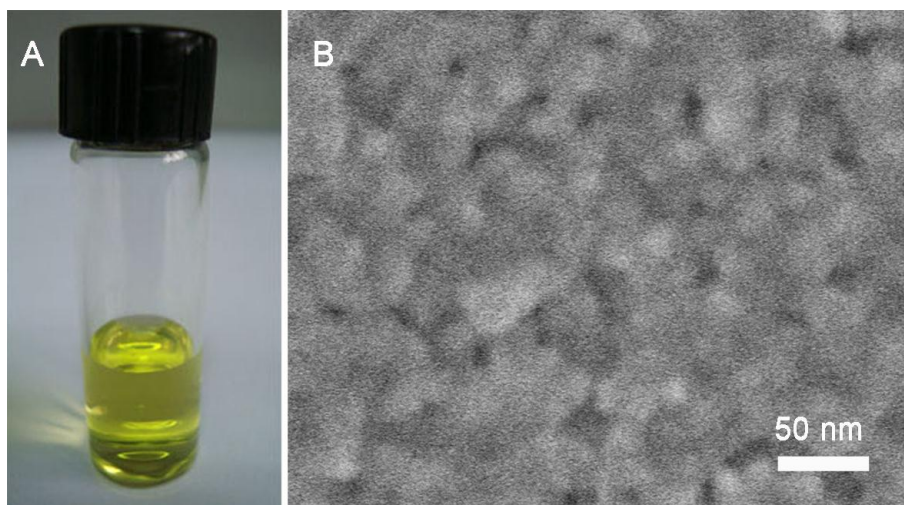

**Fig. S2** Photograph (A) and SEM image (B) of the QDs. The average diameter is around 20 nm.

## Deoxygenating experiment

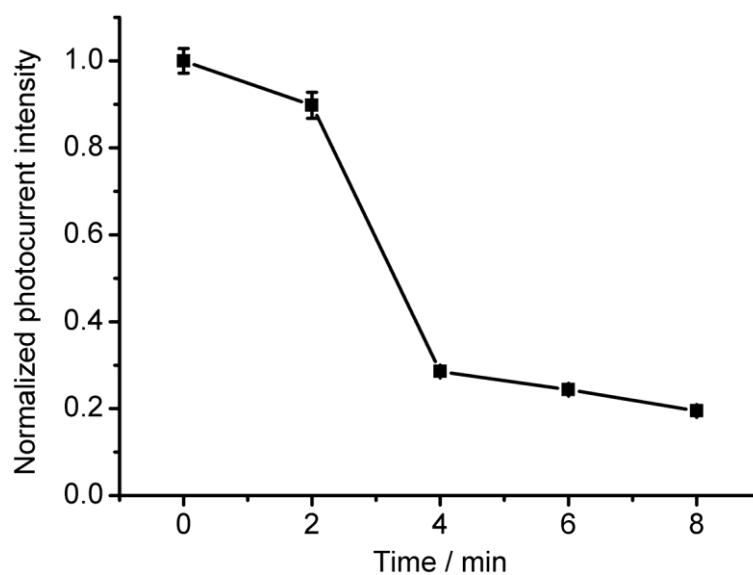

**Fig. S3** Normalized increase of photocurrent intensity measured at QDs modified FTO in air-saturated  $\text{H}_3\text{BO}_3\text{-Na}_2\text{B}_4\text{O}_7$  buffer after  $\text{N}_2$  bubbling for different times.

## pH optimization

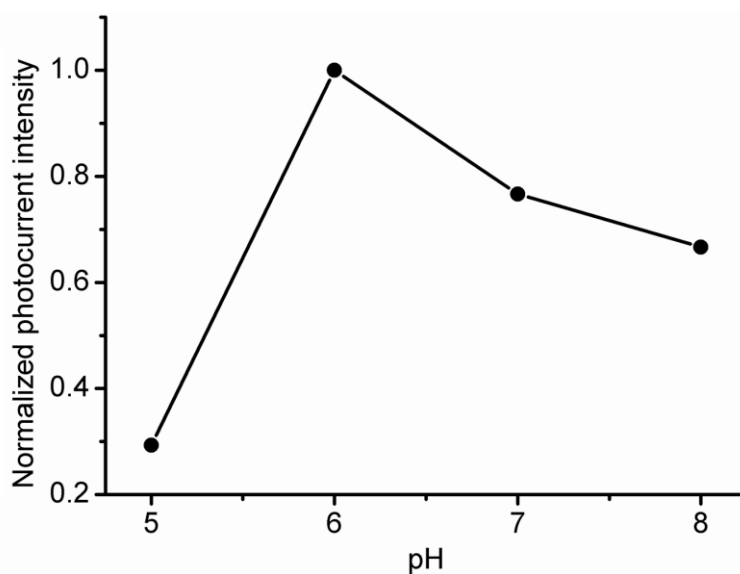

**Fig. S4** Normalized photocurrent intensity at different pH values.

## XPS spectrum of Cu2p

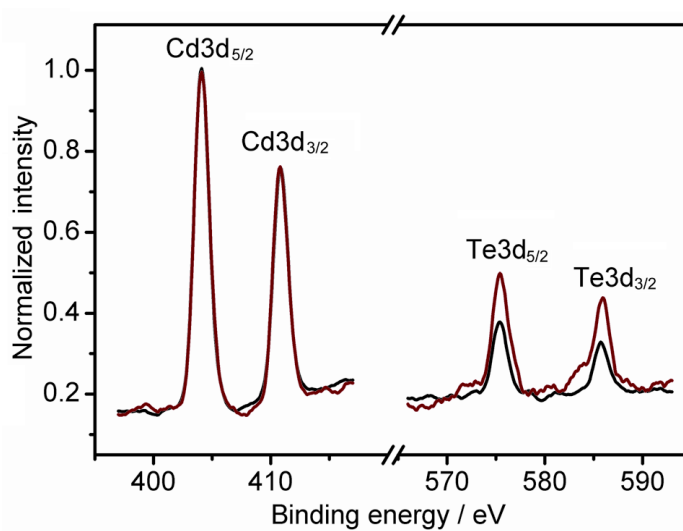

**Fig. S5** Normalized XPS intensity of Cd and Te in QDs before (black) and after (red) introducing copper ion into the system.

**Table S1** ICP spectroscopic detection results of human hair sample ( $\mu\text{g g}^{-1}$ ).

| Element | Content / ppm | Element | Content / ppm | Element | Content / ppm |
|---------|---------------|---------|---------------|---------|---------------|
| Al      | 5.33          | Mg      | 61.5          | Fe      | 43.4          |
| As      | 0.33          | Mn      | 0.34          | K       | 2.37          |
| Ba      | 1.34          | Ni      | 0.36          | Sr      | 2.61          |
| Ca      | 770           | Si      | 6.34          | Zn      | 264           |
| Cu      | 10.1          |         |               |         |               |

## Reference

- S1. X. Liu, L. X. Cheng, J. P. Lei, H. Liu and H. X. Ju, *Chem. Eur. J.*, 2010, **16**, 10764–10770.
